# Supplementary material for: Enhanced Li+ charge storage in naphthalene diimide/vanadium pentoxide intercalates
Source: Royal Society of Chemistry journal article supplement (doi:10.1039/c8ra02970a), 2018-01-01
Supplement: c8ra02970a1.pdf [file c8ra02970a1.pdf]

# Electronic supplementary information for : Enhanced Li<sup>+</sup> Charge Storage in Naphthalene Diimide/Vanadium Pentoxide Intercalates.

Francisco de Araújo Silva,<sup>a</sup> Renato Salviato Cicolani,<sup>a</sup> Gilberto Lima<sup>a</sup>, Fritz Huguenin and Grgoire Jean-François Demets\*<sup>a</sup>

Received Xth XXXXXXXXXXXX 2013, Accepted Xth XXXXXXXXXXXX 201X

First published on the web Xth XXXXXXXXXXXX 201X

DOI: 10.1039/b000000x

## 1 NDI-ph characterization

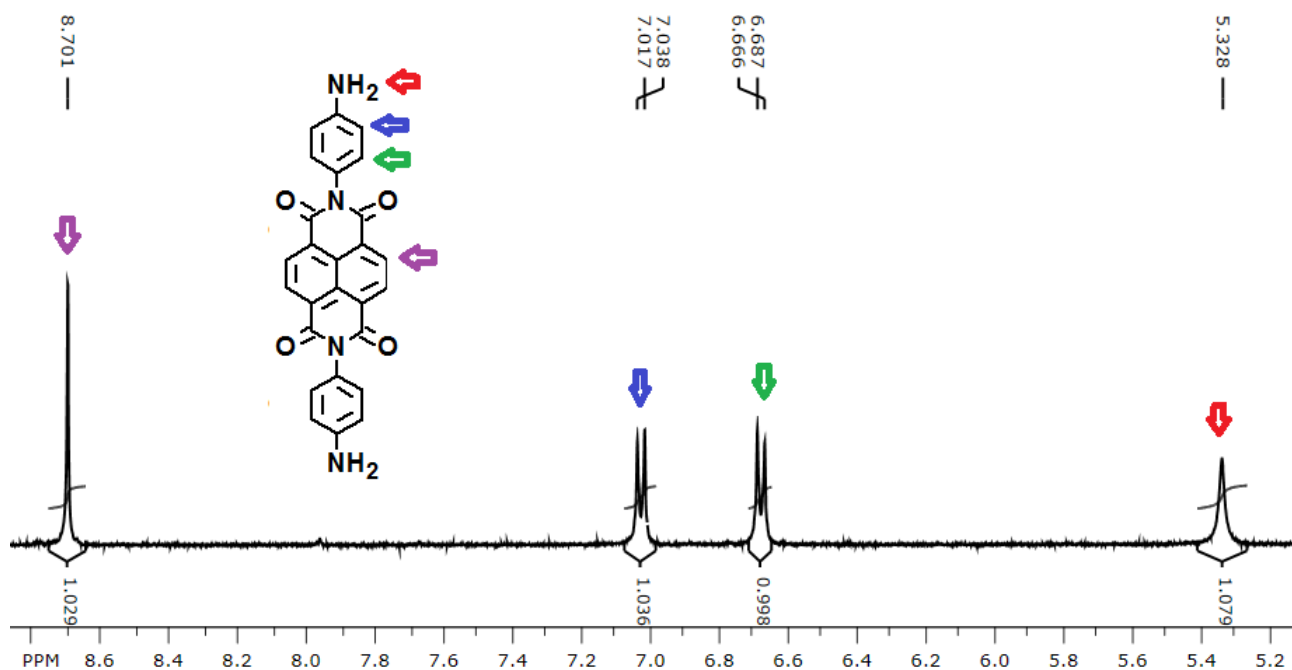

Fig. 1 <sup>1</sup>H-NMR spectrum of NDI-ph.

<sup>a</sup>Laboratório de Materiais e Interfaces Moleculares, DQ-FFCLRP Universidade de São Paulo. Av Bandeirantes 3900 CEP 14040-901; Ribeirão Preto, S.P., Brazil. Fax: 5516 36024861; Tel: 5516 36024860; E-mail: greg@usp.br

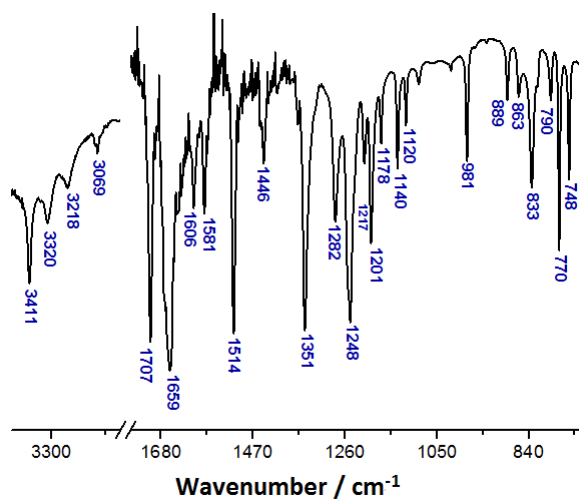

Fig. 2 FTIR spectrum of NDI-ph.

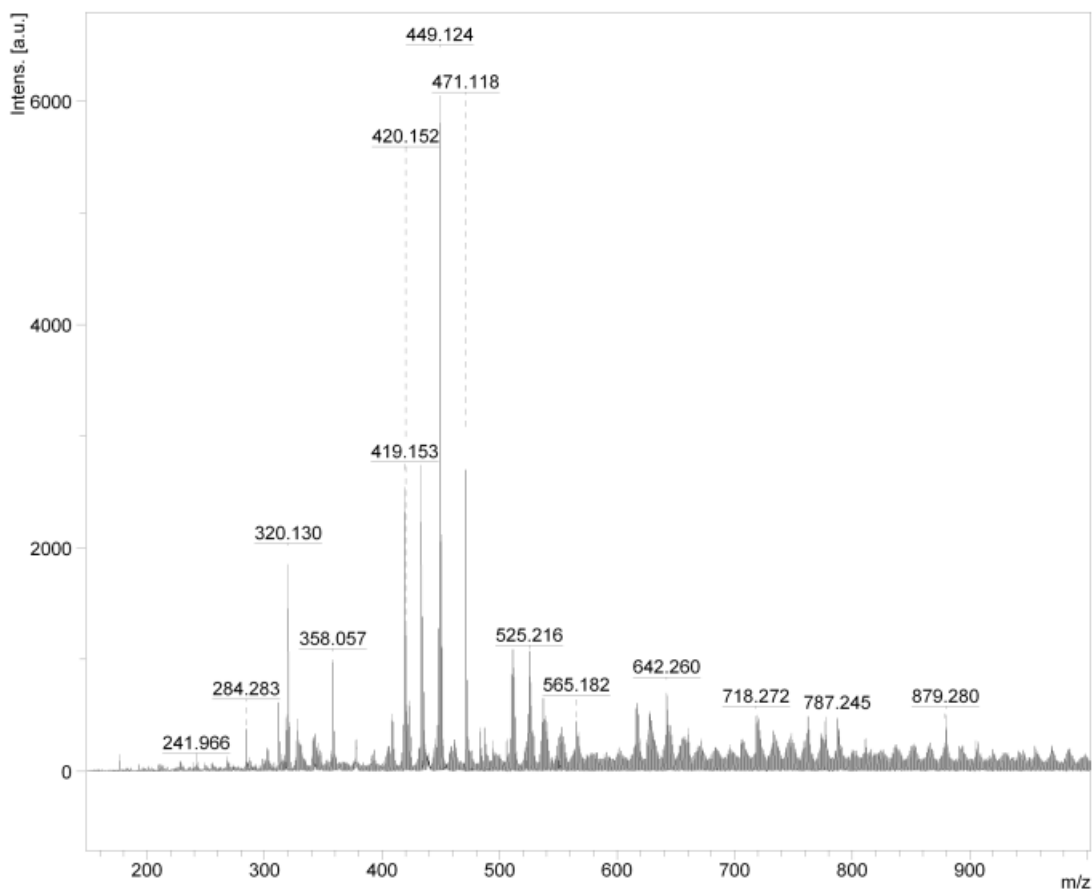

Fig. 3 Maldi-TOF for NDI-ph.

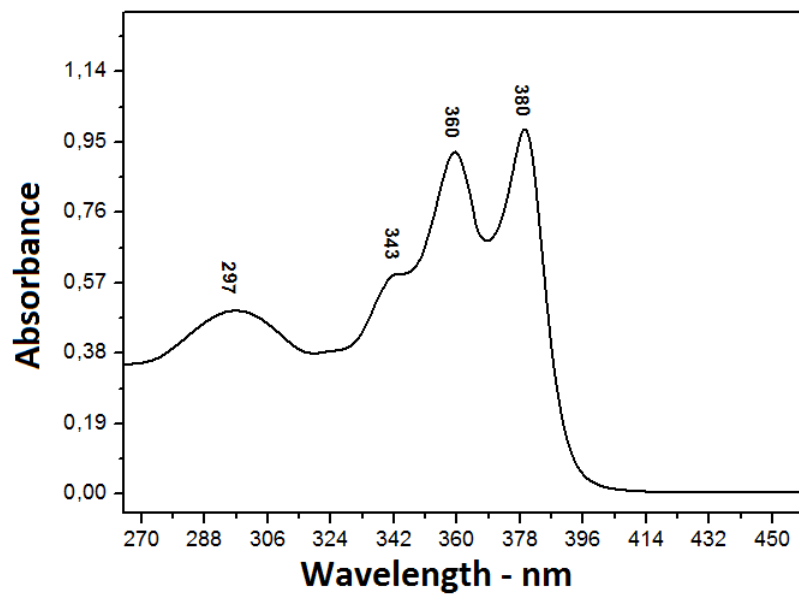

Fig. 4 Electronic spectrum of NDI-ph in DMF

## 2 Composites characterization

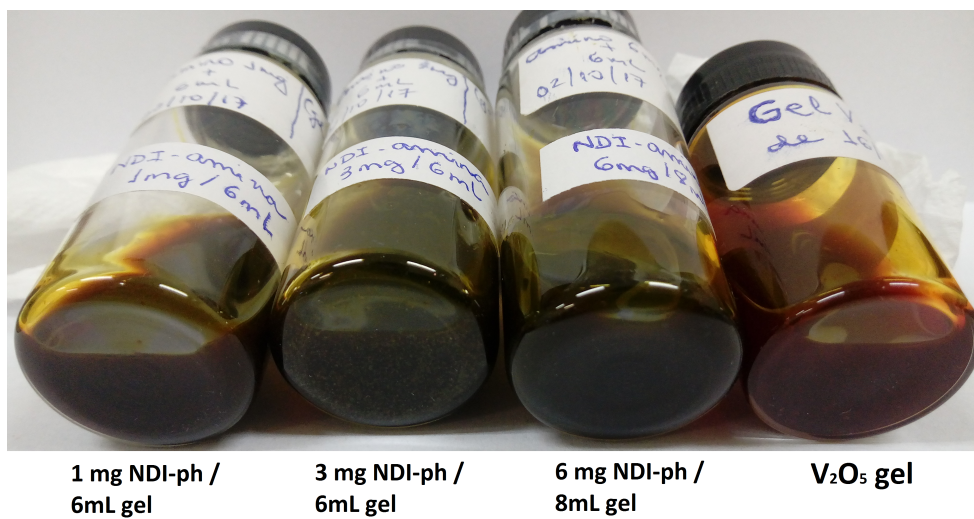

Fig. 5 Gels containing NDI-ph, and the control sample, before drying.

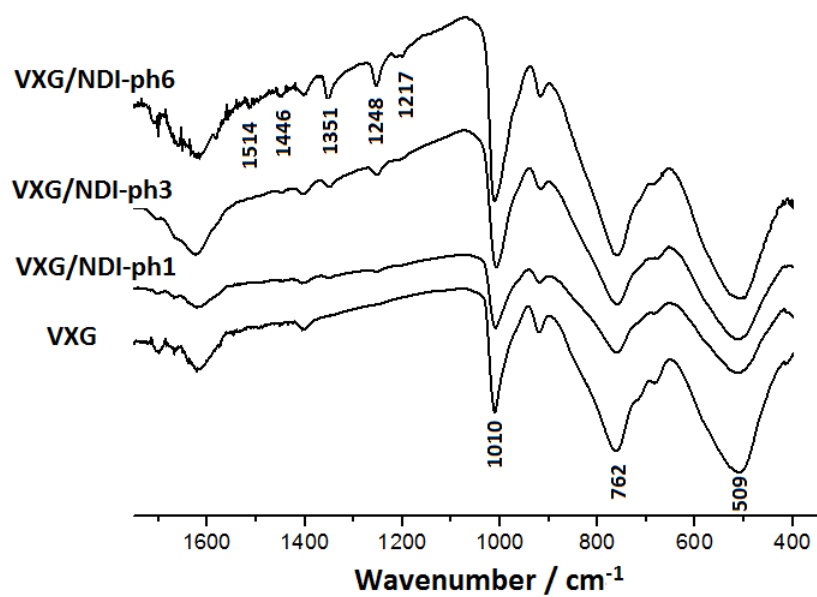

Fig. 6 FTIR spectra of the composites and VXG.

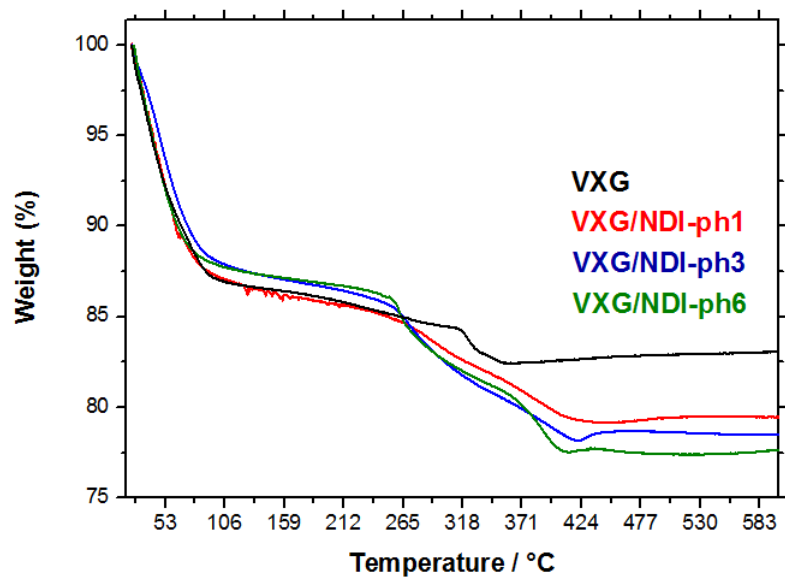

Fig. 7 Thermogravimetric analysis of the composites and VXG.

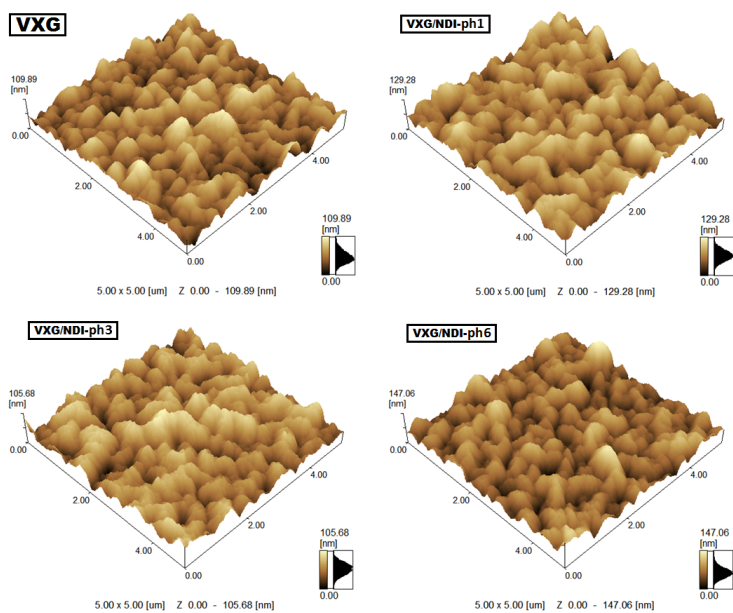

Fig. 8 afm

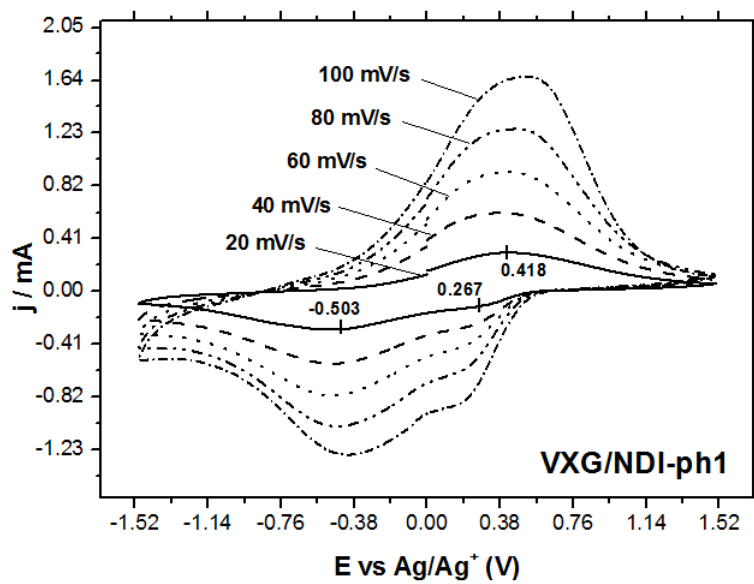

Fig. 9 Cyclic voltammograms of VXG. at 20mV/s (LiClO<sub>4</sub>/MeCN).

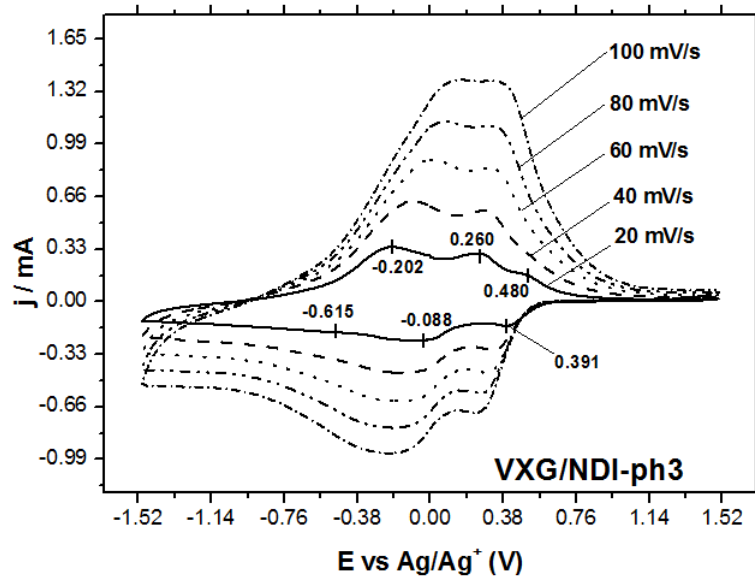

Fig. 10 Cyclic voltammograms of VXG at 20mV/s (LiClO<sub>4</sub>/MeCN).

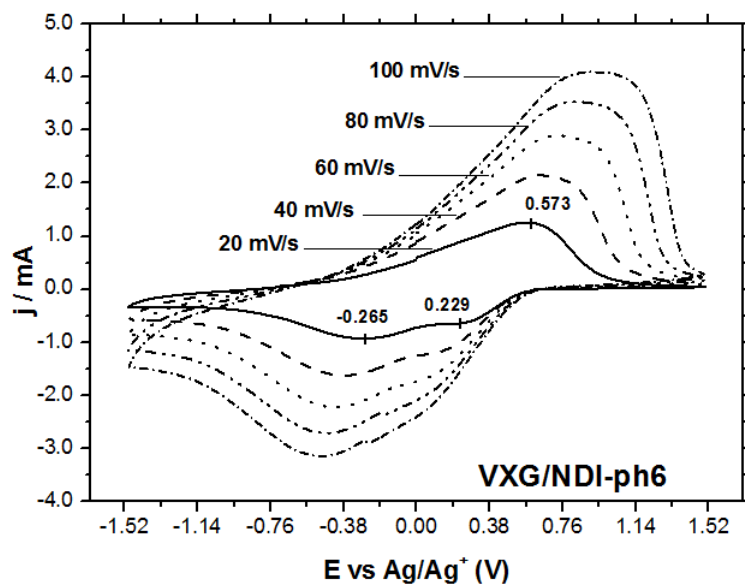

Fig. 11 Cyclic voltammograms of VXG.at 20mV/s (LiClO<sub>4</sub>/MeCN).

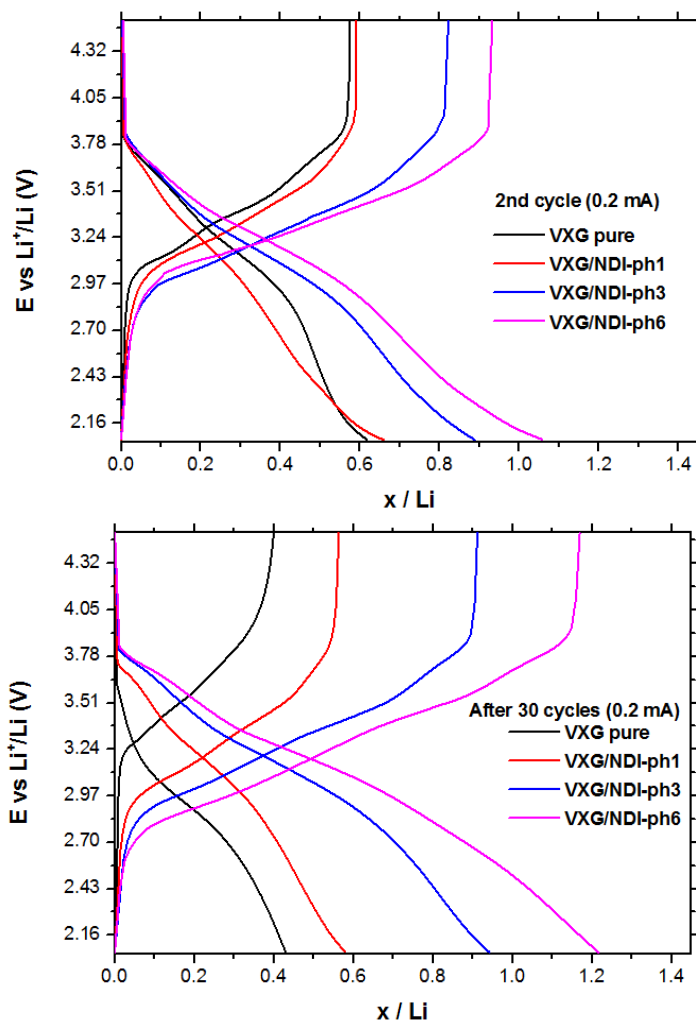

**Fig. 12** (a) Lithium ion inserted/extracted in the films as a function of discharge/charge current (cutoff E 4.47 V to 2.07 vs  $\text{Li}^+/\text{Li}$ ,  $j = 0.2$  mA) per mol of  $\text{V}_2\text{O}_5$ ; (b) Lithium ion inserted/extracted in the films as a function of discharge/charge current (cutoff E 4.47 V to 2.07 vs  $\text{Li}^+/\text{Li}$ ,  $j = 0.2$  mA) per mol of  $\text{V}_2\text{O}_5$  - after 30th cycles.
